# Supplementary material
Source: PubMed Central journal article supplement (PMC58549)

# Neighbor-Joining Tree of 610 Arabidopsis RLKs Based on Kinase Domain Amino Acid Sequence Alignment

Shiu, S.-H. and Bleecker, A. B. 2001.

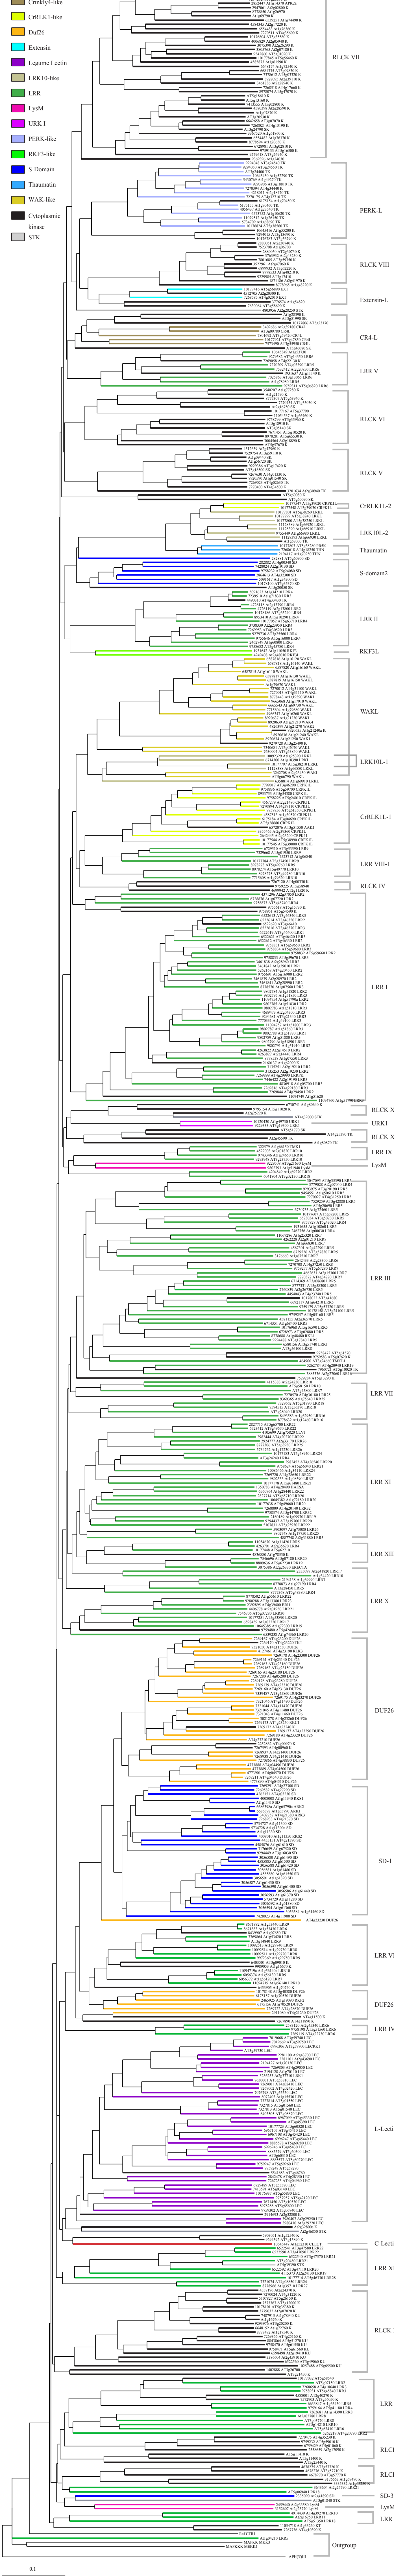

Supplement: pnas_181141598_4.pdf [file pnas_181141598_4.pdf]
